# Supplementary material
Source: PubMed Central journal article supplement (PMC3608422)
Supplement: NIHMS449409-supplement-Supplementary_Materials.pdf [file NIHMS449409-supplement-Supplementary_Materials.pdf]

1  
2  
3  
4  
5  
6  
7  
8  
9  
10  
11  
12  
13  
14  
15  
16  
17  
18  
19  
20  
21  
22  
23  
24  
25  
26  
27  
28  
29  
30  
31  
32  
33  
34  
35  
36  
37  
38  
39  
40  
41  
42  
43  
44  
45  
46  
47  
48  
49  
50  
51  
52  
53  
54  
55  
56  
57  
58  
59  
60

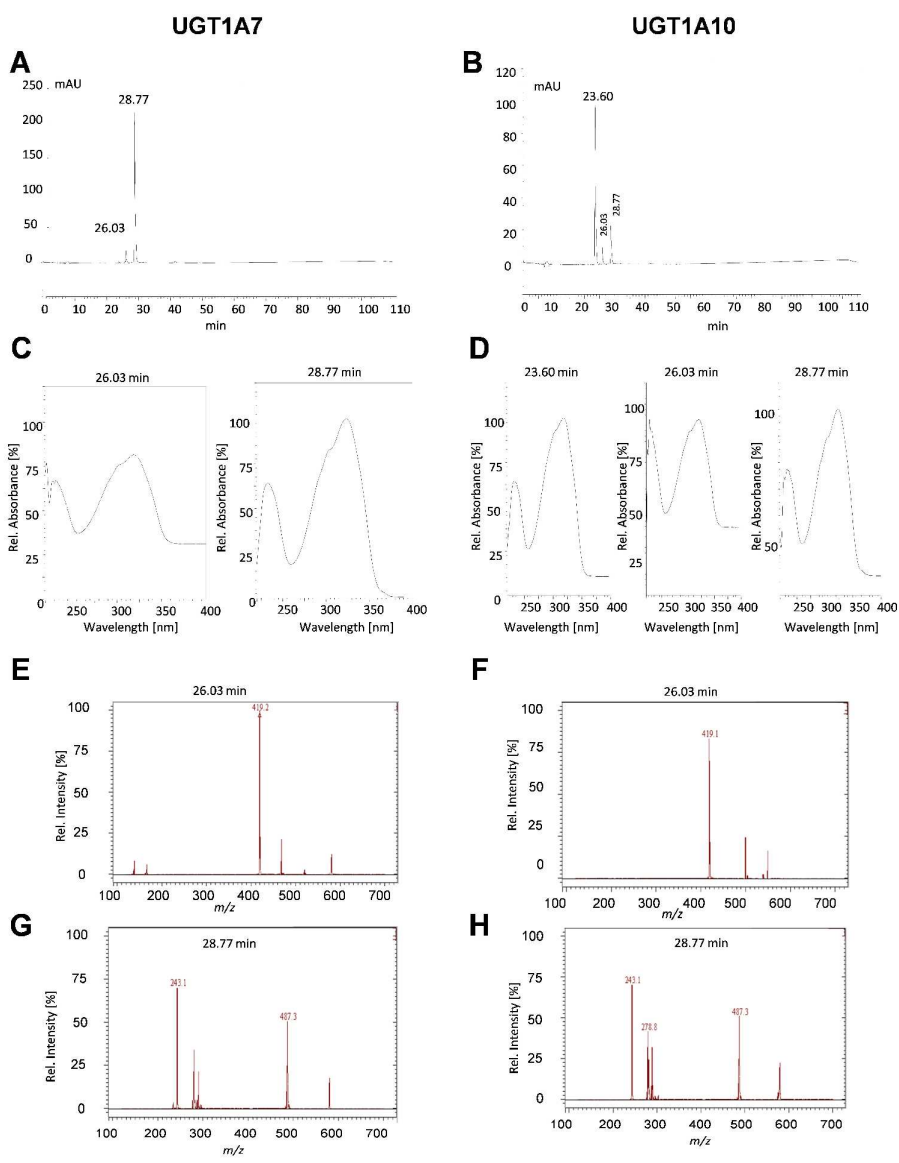

Supplemental File 1  
1190x1587mm (96 x 96 DPI)

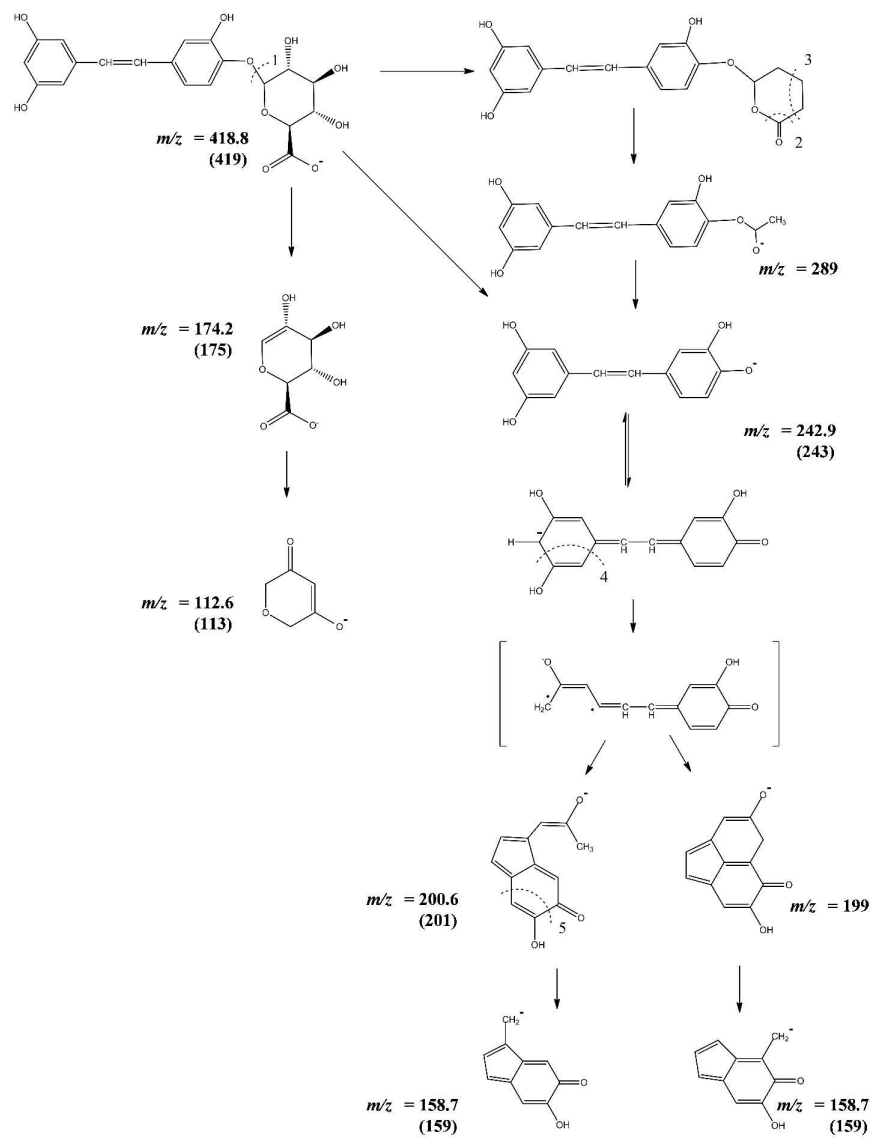

Supplemental File 2  
1190x1587mm (96 x 96 DPI)

**Table S1.** Glide GScore docking scores, experimental  $K_i$  values and binding poses.

| Ligand                                       | Glide GScore | $K_i^a$  | Docked Pose <sup>b</sup>                                                             |
|----------------------------------------------|--------------|----------|--------------------------------------------------------------------------------------|
| N-alkyl isatin benzohydrazide                | -8.18        | <i>b</i> | 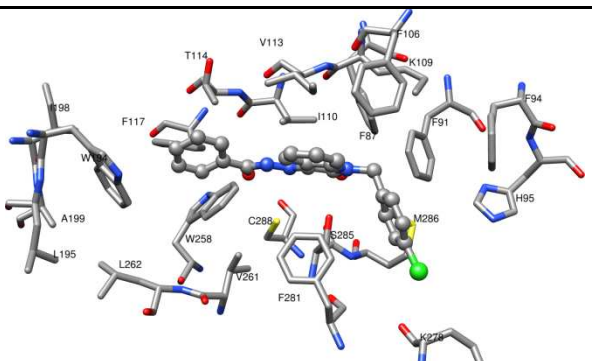  |
| 3-glucuronide-trans-arachidin-3 <sup>c</sup> | -7.51        | --       |  |

trans-arachidin-2 (tA2)<sup>c</sup> -7.48 --

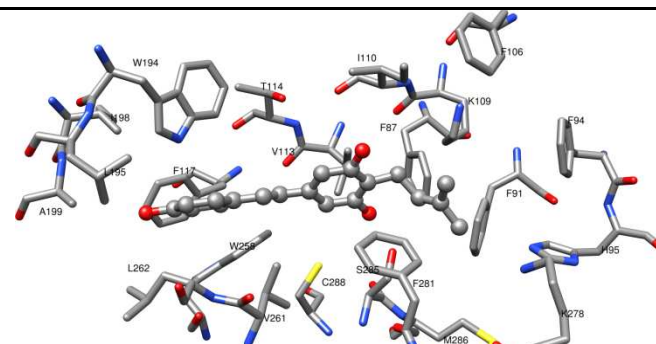

trans-arachidin-3 (tA3)<sup>c</sup> -7.11 11.3 ± 0.6

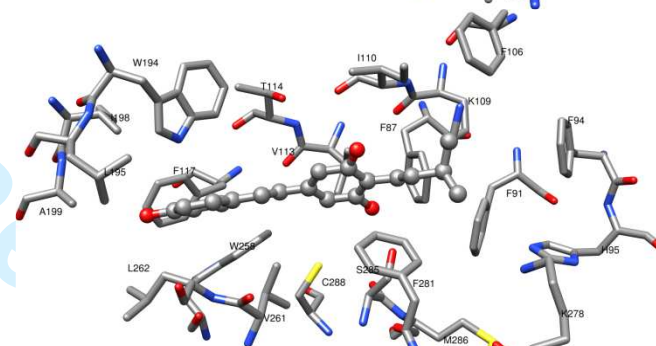

3-glucuronide-trans-arachidin-2<sup>c</sup> -7.00 --

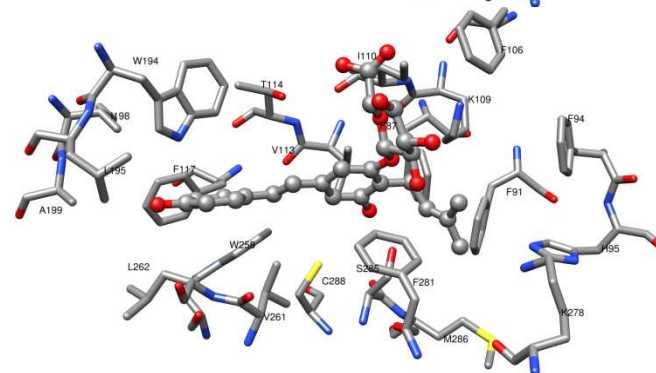

trans-arachidin-1 (tA1)<sup>c</sup> -6.95 12.6 ± 1.7

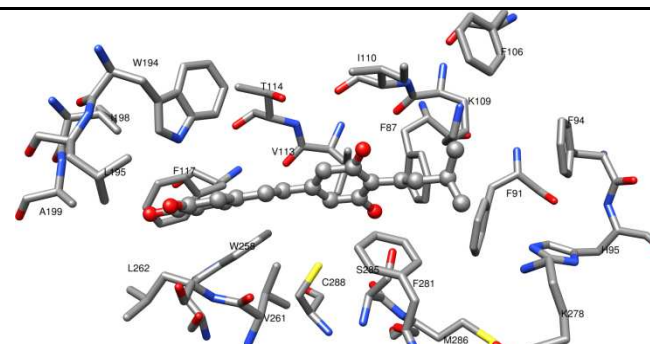

3-glucuronide-trans-arachidin-1<sup>c</sup> -6.88 --

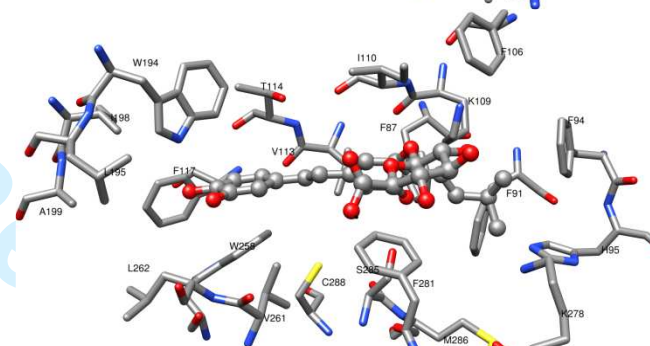

trans-resveratrol (tRes)<sup>c</sup> -6.66 65.5 ± 12.4

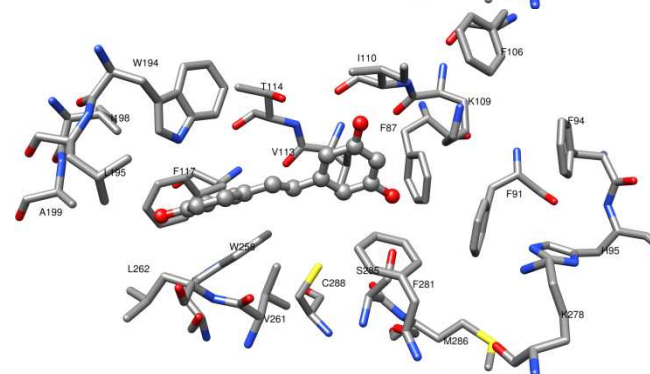

1  
2  
3  
4  
5  
6  
7  
8  
9  
10  
11  
12  
13  
14  
15  
16  
17  
18  
19  
20  
21  
22  
23  
24  
25  
26  
27  
28  
29  
30  
31  
32  
33  
34  
35  
36  
37  
38  
39  
40  
41  
42  
43  
44  
45  
46  
47  
48  
49

---

|                                  |       |    |
|----------------------------------|-------|----|
| 4'-glucuronide-trans-arachidin-3 | -6.54 | -- |
|----------------------------------|-------|----|

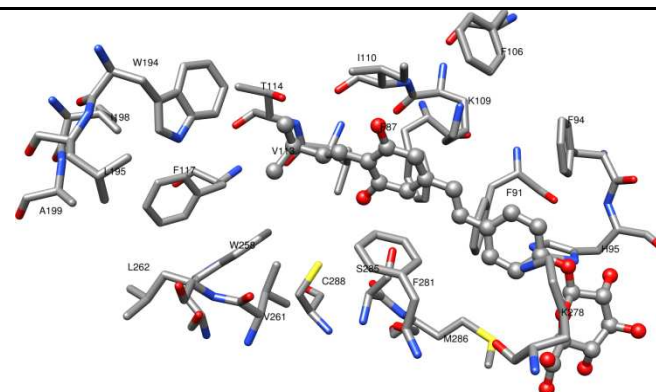

|                                        |       |           |
|----------------------------------------|-------|-----------|
| trans-piceatannol (tPice) <sup>c</sup> | -6.27 | 114 ± 7.8 |
|----------------------------------------|-------|-----------|

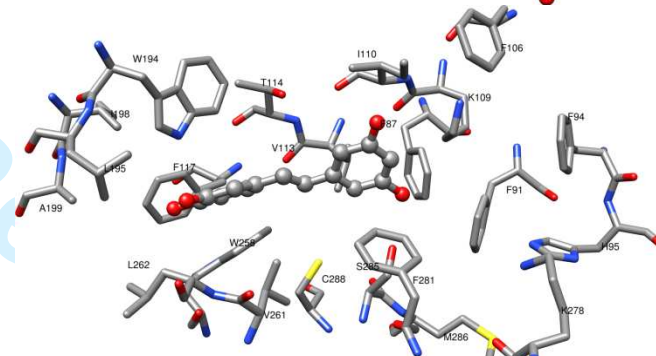

|                                               |       |    |
|-----------------------------------------------|-------|----|
| 4'-glucuronide-trans-piceatannol <sup>c</sup> | -6.03 | -- |
|-----------------------------------------------|-------|----|

---

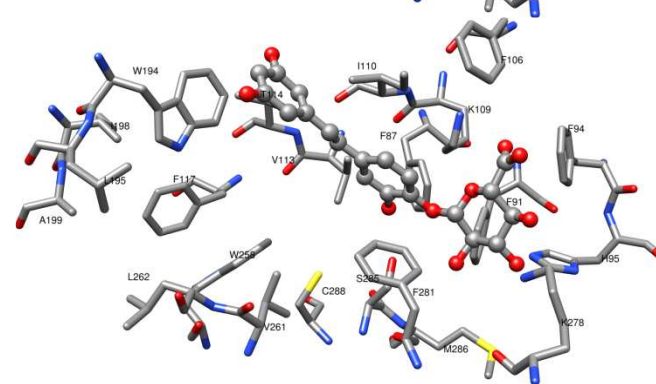

1  
2  
3  
4  
5  
6  
7  
8  
9  
10  
11  
12  
13  
14  
15  
16  
17  
18  
19  
20  
21  
22  
23  
24  
25  
26  
27  
28  
29  
30  
31  
32  
33  
34  
35  
36  
37  
38  
39  
40  
41  
42  
43  
44  
45  
46  
47  
48  
49

---

3-glucuronide-trans-resveratrol<sup>c</sup>      -5.95      --

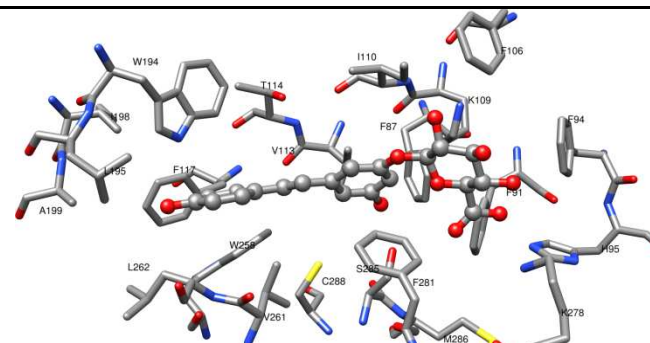

3-glucuronide-trans-piceatannol<sup>c</sup>      -5.86      >100

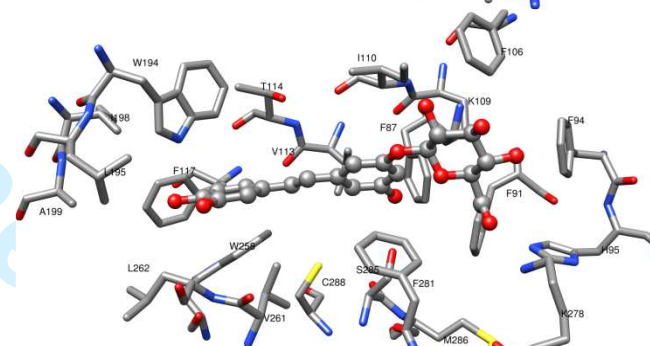

4'-glucuronide-trans-arachidin-2      -5.80      --

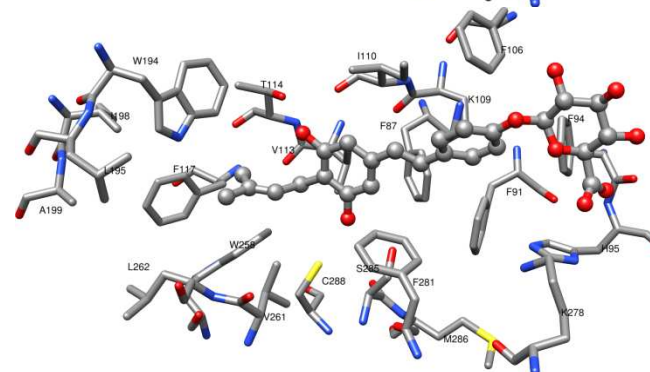



1  
2  
3  
4  
5  
6  
7  
8  
9  
10  
11  
12  
13  
14  
15  
16  
17  
18  
19  
20  
21  
22  
23  
24  
25  
26  
27  
28  
29  
30  
31  
32  
33  
34  
35  
36  
37  
38  
39  
40  
41  
42  
43  
44  
45  
46  
47  
48  
49

---

|                                               |       |      |
|-----------------------------------------------|-------|------|
| 4'-glucuronide-trans-resveratrol <sup>c</sup> | -5.71 | >100 |
|-----------------------------------------------|-------|------|

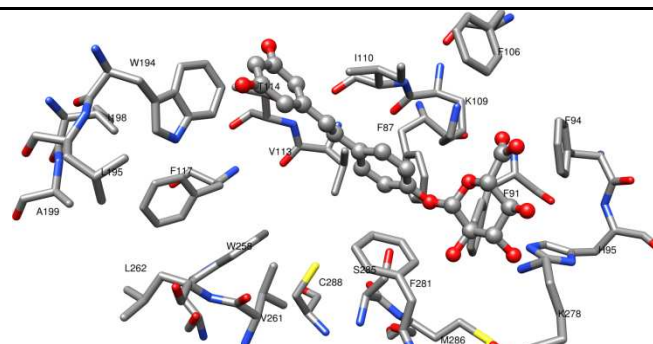

|                                  |       |    |
|----------------------------------|-------|----|
| 4'-glucuronide-trans-arachidin-1 | -5.06 | -- |
|----------------------------------|-------|----|

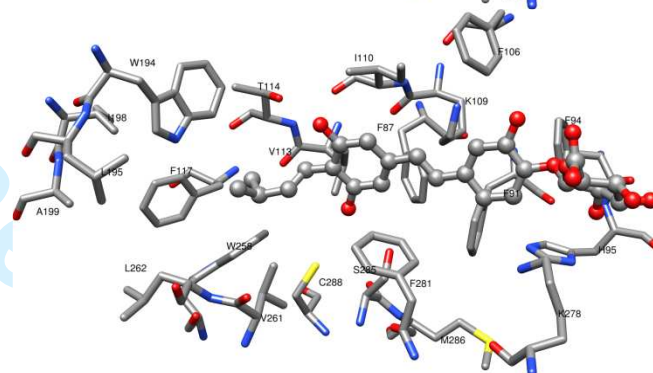


---

-- No data.

<sup>a</sup> In  $\mu\text{M}$ .

<sup>b</sup>  $\text{IC}_{50} = 131.1 (\pm 1.7) \text{ nM}$  for  $N'$ -[(3Z)-1-(4-Chlorobenzyl)-2-oxo-1,2-dihydro-3H-indol-3-ylidene] benzohydrazide (**54** in Ref. (26)).

<sup>c</sup> Compounds docked for the selection of the protein model.

<sup>†</sup> Snapshots rendered using the UCSF Chimera package from the Resource for Biocomputing, Visualization, and Informatics at the University of California, San Francisco (UCSF Chimera--a visualization system for exploratory research and analysis. Pettersen EF, Goddard TD, Huang CC, Couch GS, Greenblatt DM, Meng EC, Ferrin TE. J Comput Chem. 2004 Oct;25(13):1605-12).
